# Supplementary material
Source: PubMed Central journal article supplement (PMC4646218)
Supplement: supp_M115.637397_jbc.M115.637397-1.pdf [file supp_M115.637397_jbc.M115.637397-1.pdf]

**Supporting information**  
for

**Host cell-catalyzed S-palmitoylation mediates Golgi targeting of the *Legionella* ubiquitin ligase  
GobX\***

Yi-Han Lin, Eric Cheng, Alexandra G. Doms, Byoungkwan Kim, Timothy R. Evans, and Matthias P.  
Machner<sup>#</sup>

Unit on Microbial Pathogenesis, Cell Biology and Metabolism Program, *Eunice Kennedy Shriver*  
National Institute of Child Health and Human Development, National Institutes of Health, Bethesda,  
Maryland, USA, 20892

\*Running title: *S-Palmitoylation of Legionella GobX*

**Table S1. Plasmids used in this study.**

| Name                                                       | Properties                                                                                                                | Source     |
|------------------------------------------------------------|---------------------------------------------------------------------------------------------------------------------------|------------|
| <i>E. coli</i>                                             |                                                                                                                           |            |
| pDEST17                                                    | Gateway <sup>TM</sup> destination vector generating an N-terminal His <sub>6</sub> tag                                    | Invitrogen |
| pDEST17-Lpg2455                                            | <i>lpg2455</i> in pDEST17                                                                                                 | This study |
| pGEX-6p-1                                                  | <i>E. coli</i> expression vector generating an N-terminal GST fusion                                                      | GE         |
| pGEX-6p-1-Lpg2455                                          | <i>lpg2455</i> in pGEX-6p-1                                                                                               | This study |
| pGEX-6p-1-Lpg2455 <sup>I58A</sup>                          | pGEX-6p-1-Lpg2455 with mutation I58A                                                                                      | This study |
| pGEX-6p-1-Lpg2455 <sup>W87A</sup>                          | pGEX-6p-1-Lpg2455 with mutation W87A                                                                                      | This study |
| pGEX-6p-1-Lpg2455 <sup>I58A/W87A</sup>                     | pGEX-6p-1-Lpg2455 with mutation I58A and W87A                                                                             | This study |
| <i>Legionella</i>                                          |                                                                                                                           |            |
| pJB908                                                     | <i>Legionella</i> expression vector; a derivative of pKB5 (Amp <sup>r</sup> <i>tdi</i> )                                  | (1)        |
| pJB908D                                                    | pJB908 containing the nucleotides between <i>attR1-attR2</i> from pDEST17; Gateway <sup>TM</sup> compatible               | This study |
| pJB908D-Lpg2455                                            | <i>lpg2455</i> in pJB908D                                                                                                 | This study |
| pSR47S                                                     | R6K suicide vector (Kan <sup>r</sup> <i>sacB</i> )                                                                        | (2)        |
| pSR47S-Δlpg2455                                            | pSR47S containing flanking regions of <i>lpg2455</i>                                                                      | This study |
| pXDC61                                                     | <i>Legionella</i> expression vector derived from pMMB207C                                                                 | (3)        |
| pXDC61-Lpg2455                                             | <i>lpg2455</i> in pXDC61                                                                                                  | This study |
| pXDC61.1-HA                                                | pXDC61 backbone with the β-lactamase region replaced by a hemagglutinin (HA) tag at the <i>NdeI</i> and <i>KpnI</i> sites | This study |
| pXDC61.1-HA-Lpg2455                                        | <i>lpg2455</i> in pXDC61.1-HA                                                                                             | This study |
| pXDC61.1-HA-Lpg2455 <sup>C175A</sup>                       | pXDC61.1-HA-Lpg2455 with mutation C175A                                                                                   | This study |
| <i>S. cerevisiae</i>                                       |                                                                                                                           |            |
| pYES2/NTA                                                  | <i>S. cerevisiae</i> expression vector containing the <i>URA3</i> gene and 2μ origin                                      | Invitrogen |
| pYES2-VipD                                                 | <i>vipD</i> in pYES2/NTA                                                                                                  | (4)        |
| pYES2-Lpg2455                                              | <i>Lpg2455</i> in pYES2/NTA                                                                                               | This study |
| pYES2-Lpg2455 <sup>I58A</sup>                              | pYES2-Lpg2455 with mutation I58A                                                                                          | This study |
| pYES2-Lpg2455 <sup>W87A</sup>                              | pYES2-Lpg2455 with mutation W87A                                                                                          | This study |
| pYES2-Lpg2455 <sup>I58A/W87A</sup>                         | pYES2-Lpg2455 with mutation I58A and W87A                                                                                 | This study |
| Cell culture                                               |                                                                                                                           |            |
| pcDNA6.2-EmGFP                                             | Gateway <sup>TM</sup> destination vector generating an N-terminal EmGFP fusion                                            | Invitrogen |
| pcDNA6.2-EmGFP-Lpg2455                                     | <i>lpg2455</i> in pcDNA6.2-EmGFP                                                                                          | This study |
| pcDNA6.2-EmGFP-Lpg2455 <sub>1-50</sub>                     | <i>lpg2455</i> residues 1-50 in pcDNA6.2-EmGFP                                                                            | This study |
| pcDNA6.2-EmGFP-Lpg2455 <sub>51-120</sub>                   | <i>lpg2455</i> residues 51-120 in pcDNA6.2-EmGFP                                                                          | This study |
| pcDNA6.2-EmGFP-Lpg2455 <sub>1-120</sub>                    | <i>lpg2455</i> residues 1-120 in pcDNA6.2-EmGFP                                                                           | This study |
| pcDNA6.2-EmGFP-Lpg2455 <sub>101-209</sub>                  | <i>lpg2455</i> residues 101-209 in pcDNA6.2-EmGFP                                                                         | This study |
| pcDNA6.2-EmGFP-Lpg2455 <sub>121-209</sub>                  | <i>lpg2455</i> residues 121-209 in pcDNA6.2-EmGFP                                                                         | This study |
| pcDNA6.2-EmGFP-Lpg2455 <sub>141-209</sub>                  | <i>lpg2455</i> residues 141-209 in pcDNA6.2-EmGFP                                                                         | This study |
| pcDNA6.2-EmGFP-Lpg2455 <sub>161-209</sub>                  | <i>lpg2455</i> residues 161-209 in pcDNA6.2-EmGFP                                                                         | This study |
| pcDNA6.2-EmGFP-Lpg2455 <sub>181-209</sub>                  | <i>lpg2455</i> residues 181-209 in pcDNA6.2-EmGFP                                                                         | This study |
| pcDNA6.2-EmGFP-Lpg2455 <sub>161-200</sub>                  | <i>lpg2455</i> residues 161-200 in pcDNA6.2-EmGFP                                                                         | This study |
| pcDNA6.2-EmGFP-Lpg2455 <sub>161-190</sub>                  | <i>lpg2455</i> residues 161-190 in pcDNA6.2-EmGFP                                                                         | This study |
| pcDNA6.2-EmGFP-Lpg2455 <sub>161-180</sub>                  | <i>lpg2455</i> residues 161-180 in pcDNA6.2-EmGFP                                                                         | This study |
| pcDNA6.2-EmGFP-Lpg2455 <sub>171-190</sub>                  | <i>lpg2455</i> residues 171-190 in pcDNA6.2-EmGFP                                                                         | This study |
| pcDNA6.2-EmGFP-Lpg2455 <sup>C56S</sup>                     | pcDNA6.2-EmGFP-Lpg2455 with mutation C56S                                                                                 | This study |
| pcDNA6.2-EmGFP-Lpg2455 <sup>C175S</sup>                    | pcDNA6.2-EmGFP-Lpg2455 with mutation C175S                                                                                | This study |
| pcDNA6.2-EmGFP-Lpg2455 <sup>C175A</sup>                    | pcDNA6.2-EmGFP-Lpg2455 with mutation C175A                                                                                | This study |
| pcDNA6.2-EmGFP-Lpg2455 <sub>161-209</sub> <sup>C175A</sup> | pcDNA6.2-EmGFP-Lpg2455 <sub>161-209</sub> with mutation C175A                                                             | This study |
| pcDNA6.2-EmGFP-Lpg2455 <sup>Q171A</sup>                    | pcDNA6.2-EmGFP-Lpg2455 with mutation Q171A                                                                                | This study |
| pcDNA6.2-EmGFP-Lpg2455 <sup>S172A</sup>                    | pcDNA6.2-EmGFP-Lpg2455 with mutation S172A                                                                                | This study |
| pcDNA6.2-EmGFP-Lpg2455 <sup>R173A</sup>                    | pcDNA6.2-EmGFP-Lpg2455 with mutation R173A                                                                                | This study |
| pcDNA6.2-EmGFP-Lpg2455 <sup>S174A</sup>                    | pcDNA6.2-EmGFP-Lpg2455 with mutation S174A                                                                                | This study |
| pcDNA6.2-EmGFP-Lpg2455 <sup>W176A</sup>                    | pcDNA6.2-EmGFP-Lpg2455 with mutation W176A                                                                                | This study |
| pcDNA6.2-EmGFP-Lpg2455 <sup>S177A</sup>                    | pcDNA6.2-EmGFP-Lpg2455 with mutation S177A                                                                                | This study |
| pcDNA6.2-EmGFP-Lpg2455 <sup>L178A</sup>                    | pcDNA6.2-EmGFP-Lpg2455 with mutation L178A                                                                                | This study |
| pcDNA6.2-EmGFP-Lpg2455 <sup>F179A</sup>                    | pcDNA6.2-EmGFP-Lpg2455 with mutation F179A                                                                                | This study |

|                                         |                                                                     |            |
|-----------------------------------------|---------------------------------------------------------------------|------------|
| pcDNA6.2-EmGFP-Lpg2455 <sup>Y181A</sup> | pcDNA6.2-EmGFP-Lpg2455 with mutation Y181A                          | This study |
| pcDNA6.2-EmGFP-Lpg2455 <sup>S182A</sup> | pcDNA6.2-EmGFP-Lpg2455 with mutation S182A                          | This study |
| pcDNA6.2-EmGFP-Lpg2455 <sup>I183A</sup> | pcDNA6.2-EmGFP-Lpg2455 with mutation I183A                          | This study |
| pcDNA6.2-EmGFP-Lpg2455 <sup>F184A</sup> | pcDNA6.2-EmGFP-Lpg2455 with mutation F184A                          | This study |
| pcDNA6.2-EmGFP-Lpg2455 <sup>K187A</sup> | pcDNA6.2-EmGFP-Lpg2455 with mutation K187A                          | This study |
| pcDNA6.2-EmGFP-Lpg2455 <sup>D188A</sup> | pcDNA6.2-EmGFP-Lpg2455 with mutation D188A                          | This study |
| pcDNA6.2-EmGFP-Lpg2455 <sup>N189A</sup> | pcDNA6.2-EmGFP-Lpg2455 with mutation N189A                          | This study |
| pcDNA6.2-EmGFP-Lpg2455 <sup>R190A</sup> | pcDNA6.2-EmGFP-Lpg2455 with mutation R190A                          | This study |
| pcDNA6.2-EmGFP-Lpg2455 <sup>L178S</sup> | pcDNA6.2-EmGFP-Lpg2455 with mutation L178S                          | This study |
| pcDNA6.2-EmGFP-Lpg2455 <sup>L180S</sup> | pcDNA6.2-EmGFP-Lpg2455 with mutation L180S                          | This study |
| pEGFP-C1                                | Mammalian expression vector generating an N-terminal GFP fusion     | Clontech   |
| pEGFP-C1-Lpg2455 <sub>171-190</sub>     | <i>lpg2455</i> residues 171-190 in pEGFP-C1                         | This study |
| pEGFP-C1-Lpg2455 <sub>172-186</sub>     | <i>lpg2455</i> residues 172-186 in pEGFP-C1                         | This study |
| pEGFP-C1-Lpg2455 <sub>175-184</sub>     | <i>lpg2455</i> residues 175-184 in pEGFP-C1                         | This study |
| pEGFP-C1-Lpl2374 <sub>171-190</sub>     | <i>lpl2374</i> residues 171-190 in pEGFP-C1                         | This study |
| pEGFP-C1-Lpo2646 <sub>171-190</sub>     | <i>lpo2646</i> residues 171-190 in pEGFP-C1                         | This study |
| pEF-BOS/HA-DHHS4                        | pEF-BOS/HA-DHHC4 with a Cys->Ser substitution in the DHHC motif     | This study |
| pEF-BOS/HA-DHHS21                       | pEF-BOS/HA-DHHC21 with a Cys->Ser substitution in the DHHC motif    | This study |
| pmCherry-C1                             | Mammalian expression vector generating an N-terminal mCherry fusion | Clontech   |
| pmCherry-C1-Lpg2455                     | <i>lpg2455</i> in pmCherry-C1                                       | This study |

1. Sexton, J. A., Pinkner, J. S., Roth, R., Heuser, J. E., Hultgren, S. J., and Vogel, J. P. (2004) The Legionella pneumophila PilT Homologue DotB Exhibits ATPase Activity That Is Critical for Intracellular Growth. *Journal of Bacteriology* **186**, 1658-1666
2. Merriam, J. J., Mathur, R., Maxfield-Boumil, R., and Isberg, R. R. (1997) Analysis of the Legionella pneumophila *fliI* gene: intracellular growth of a defined mutant defective for flagellum biosynthesis. *Infection and Immunity* **65**, 2497-2501
3. de Felipe, K. S., Glover, R. T., Charpentier, X., Anderson, O. R., Reyes, M., Pericone, C. D., and Shuman, H. A. (2008) Legionella Eukaryotic-Like Type IV Substrates Interfere with Organelle Trafficking. *PLoS Pathog* **4**, e1000117
4. Gaspar, A. H., and Machner, M. P. (2014) VipD is a Rab5-activated phospholipase A1 that protects Legionella pneumophila from endosomal fusion. *Proceedings of the National Academy of Sciences* **111**, 4560-4565

**Table S2. Oligonucleotides used in this study.**

| <b>Name</b>            | <b>Sequence (5'→3', <b>bold</b>: mutation; <u>underline</u>: RE site; <i>italic</i>: attB)</b> | <b>Cloning</b>  |
|------------------------|------------------------------------------------------------------------------------------------|-----------------|
| BamHI_lpg2455_for      | AAAAGGATCCACGAAAATTGTTTATCTACACAATGACCC                                                        | pGEX-6p-1       |
| EcoRI_lpg2455_rev      | AAAAGAATTCCTTAATGATGGGGCTGTATATCATAACG                                                         | pGEX-6p-1       |
| lpg2455(I58A)_for      | TTTTATTGTGCAGCTTGTATGGAACCTCC                                                                  | SD              |
| lpg2455(I58A)_rev      | GGAAGTTCATACAAAGCTGCACAATAAAA                                                                  | SD              |
| lpg2455(W87A)_for      | GTGAATTAGTCAAAAGCGTTTTCAAGAGACC                                                                | SD              |
| lpg2455(W87A)_rev      | GGTCTCTTGAAAACGCTTTGACTAATTCAC                                                                 | SD              |
| pdest (SacI)           | TCACCATGAGCTCGAATCAACAAG                                                                       | pJB908          |
| pdest (KpnI)           | GCTTCCTTTTCGGGCTTTGGTACCAGCC                                                                   | pJB908          |
| lpg2455 upst_Sall      | AAAAGTCGACGAGTCATAACTTCAGCATAATGCATCG                                                          | pSR47S          |
| lpg2455 downst_SacI    | AAAAGAGCTCGGATGAGATTTGGCAAATGACTGACCG                                                          | pSR47S          |
| Δlpg2455_for           | TTCTATGGAGAGGTTATGACGAAAATTGCCCATCATTAATGAAAAT<br>AAATCAAGT                                    | Δlpg2455        |
| Δlpg2455_rev           | ACTTGATTTATTTTCATTAATGATGGGCAATTTTCGTCATAACCTCT<br>CCATAGAA                                    | Δlpg2455        |
| KpnI_lpg2455_for       | GATCGGTACCATGACGAAAATTGTTTATCTACACAATG                                                         | pXDC61          |
| XbaI_lpg2455_rev       | GATCTCTAGATTAATGATGGGGCTGTATATCATAAC                                                           | pXDC61<br>pYES2 |
| 5'P_NdeI_HA_KpnI_sense | <u>TATGGCTGGATCTTACCCATACGATGTTCCAGATTACGCTGGTAC</u>                                           | pXDC61.1-HA     |
| 5'P_NdeI_HA_KpnI_anti  | <u>CAGCGTAATCTGGAACATCGTATGGGTAAGATCCAGCCA</u>                                                 | pXDC61.1-HA     |
| BamHI_AG_lpg2455_for   | AAAAGGATCCAGATGACGAAAATTGTTTATCTACACAATG                                                       | pYES2           |
| attB1_lpg2455_1        | <i>GGGGACAAGTTTGTACAAAAAAGCAGGCTTCATGACGAAAATTGTTTA</i><br>TCTACACAATGA                        | GW              |
| attB1_lpg2455_51       | <i>GGGGACAAGTTTGTACAAAAAAGCAGGCTTCATGTTAGATTGGTTTTTA</i><br>TTGTGCAATTTG                       | GW              |
| attB1_lpg2455_101      | <i>GGGGACAAGTTTGTACAAAAAAGCAGGCTTCATGCTTGGTTTAAATGT</i><br>TACTATATCTCA                        | GW              |
| attB2_lpg2455_50       | <i>GGGGACCACTTTGTACAAGAAAGCTGGGTCCTAATCAACTACTTCGAG</i><br>TAGTTTTAATTT                        | GW              |
| attB2_lpg2455_120      | <i>GGGGACCACTTTGTACAAGAAAGCTGGGTCCTAATCAAGCAATTCCTTT</i><br>TGGAGTAGGAGT                       | GW              |
| attB2_lpg2455_209      | <i>GGGGACCACTTTGTACAAGAAAGCTGGGTCCTAATGATGGGGCTGTAT</i><br>ATCATACGATGT                        | GW              |
| attB1_lpg2455_121      | <i>GGGGACAAGTTTGTACAAAAAAGCAGGCTTCATGTTTGTATTAAATC</i><br>AACAGGATTTGC                         | GW              |
| attB1_lpg2455_141      | <i>GGGGACAAGTTTGTACAAAAAAGCAGGCTTCATGCTAGCAAAAAAAT</i><br>TCCCCCTGAGG                          | GW              |
| attB1_lpg2455_161      | <i>GGGGACAAGTTTGTACAAAAAAGCAGGCTTCATGCGCAATGAAAATAGA</i><br>TAGCCCCACTC                        | GW              |
| attB1_lpg2455_181      | <i>GGGGACAAGTTTGTACAAAAAAGCAGGCTTCATGTATAGTATTTTTGG</i><br>TGGTAAAGATAA                        | GW              |
| attB2_lpg2455_200      | <i>GGGGACCACTTTGTACAAGAAAGCTGGGTCCTATAGGGAATCAGTTTT</i><br>TTCCTGCATTAC                        | GW              |
| attB2_lpg2455_190      | <i>GGGGACCACTTTGTACAAGAAAGCTGGGTCCTATCTGTTATCTTTACC</i><br>ACCAAAAATAC                         | GW              |
| attB2_lpg2455_180      | <i>GGGGACCACTTTGTACAAGAAAGCTGGGTCCTACAAAAGAGACTCC</i><br>AGCAGGATCTTG                          | GW              |
| attB1_lpg2455_171      | <i>GGGGACAAGTTTGTACAAAAAAGCAGGCTTCATGCAGTCAAGATCCTG</i><br>CTGGAGT                             | GW              |
| lpg2455(C56S)_for      | GATTGGTTTTTATCTGCAATTTGTATGGAAC                                                                | SD              |
| lpg2455(C56S)_rev      | GTTCCATACAAATTGCAGAATAAAACCAATC                                                                | SD              |
| lpg2455(C175S)_for     | CACAGTCAAGATCCTCCTGGAGTCTCTTTTTG                                                               | SD              |
| lpg2455(C175S)_rev     | CAAAAAGAGACTCCAGGAGGATCTTGACTGTG                                                               | SD              |
| lpg2455(C175A)_for     | CACAGTCAAGATCCGCCTGGAGTCTCTTTTTG                                                               | SD              |
| lpg2455(C175A)_rev     | CAAAAAGAGACTCCAGGCGGATCTTGACTGTG                                                               | SD              |
| lpg2455(Q171A)_for     | AGCCCCACTCATTCAAGCTCAAGATCCTGC                                                                 | SD              |
| lpg2455(Q171A)_rev     | GCAGGATCTTGACGCTGAATGAGTGGGGCT                                                                 | SD              |
| lpg2455(S172A)_for     | ACTCATTACAGGCAAGATCCTGCTGG                                                                     | SD              |
| lpg2455(S172A)_rev     | CCAGCAGGATCTTGCCCTGTGAATGAGT                                                                   | SD              |

|                           |                                                         |             |
|---------------------------|---------------------------------------------------------|-------------|
| lpg2455(R173A)_for        | CTCATTACAGTCAGCATCCTGCTGGAGTC                           | SD          |
| lpg2455(R173A)_rev        | GACTCCAGCAGGATGCTGACTGTGAATGAG                          | SD          |
| lpg2455(S174A)_for        | CATTCACAGTCAAGAGCCTGCTGGAGTCTC                          | SD          |
| lpg2455(S174A)_rev        | GAGACTCCAGCAGGCTCTTGACTGTGAATG                          | SD          |
| lpg2455(W176A)_for        | CAGTCAAGATCCTGCGCGAGTCTCTTTTGG                          | SD          |
| lpg2455(W176A)_rev        | CAAAAAGAGACTCGCGCAGGATCTTGACTG                          | SD          |
| lpg2455(S177A)_for        | CAAGATCCTGCTGGGCTCTCTTTTTGTATAG                         | SD          |
| lpg2455(S177A)_rev        | CTATACAAAAAGAGAGCCAGCAGGATCTTG                          | SD          |
| lpg2455(L178A)_for        | GATCCTGCTGGAGTGCCTTTTGTATAGTATT                         | SD          |
| lpg2455(L178A)_rev        | AATACTATACAAAAAGGCACTCCAGCAGGATC                        | SD          |
| lpg2455(F179A)_for        | CCTGCTGGAGTCTCGCTTTGTATAGTATTTTTG                       | SD          |
| lpg2455(F179A)_rev        | CAAAAATACTATACAAAAGCGAGACTCCAGCAGG                      | SD          |
| lpg2455(Y181A)_for        | GGAGTCTCTTTTTGGCTAGTATTTTTGGTGG                         | SD          |
| lpg2455(Y181A)_rev        | CCACCAAAAATACTAGCCAAAAGAGACTCC                          | SD          |
| lpg2455(S182A)_for        | GTCTCTTTTTGTATGCTATTTTTGGTGGTAAAG                       | SD          |
| lpg2455(S182A)_rev        | CTTTACCACCAAAAATAGCATACAAAAAGAGAC                       | SD          |
| lpg2455(I183A)_for        | CTCTTTTTGTATAGTGCTTTTGGTGGTAAAG                         | SD          |
| lpg2455(I183A)_rev        | CTTTACCACCAAAAAGCACTATACAAAAGAG                         | SD          |
| lpg2455(F184A)_for        | CTTTTTGTATAGTATTGCTGGTGGTAAAGATAAC                      | SD          |
| lpg2455(F184A)_rev        | GTTATCTTTACCACCAGCAATACTATACAAAAG                       | SD          |
| lpg2455(K187A)_for        | GTATTTTTGGTGGTGCAGATAACAGAAAAG                          | SD          |
| lpg2455(K187A)_rev        | CTTTCTGTTATCTGCACCACCAAAAATAC                           | SD          |
| lpg2455(D188A)_for        | GTATTTTTGGTGGTAAAGCTAACAGAAAAGTAATGC                    | SD          |
| lpg2455(D188A)_rev        | GCATTACTTTTCTGTTAGCTTTACCACCAAAAATAC                    | SD          |
| lpg2455(N189A)_for        | GGTGGTAAAGATGCCAGAAAAGTAATGCAG                          | SD          |
| lpg2455(N189A)_rev        | CTGCATTACTTTTCTGGCATCTTTACCACC                          | SD          |
| lpg2455(R190A)_for        | GGTGGTAAAGATAACGCAAAAAGTAATGCAG                         | SD          |
| lpg2455(R190A)_rev        | CTGCATTACTTTTGCCTTATCTTTACCACC                          | SD          |
| lpg2455(L178S)_for        | GATCCTGCTGGAGTTCCTTTTTGTATAGTATTTTTGG                   | SD          |
| lpg2455(L178S)_rev        | CCAAAATACTATACAAAAGGAACTCCAGCAGGATC                     | SD          |
| lpg2455(L180S)_for        | GCTGGAGTCTCTTTTCGTATAGTATTTTTGGTGG                      | SD          |
| lpg2455(L180S)_rev        | CCACCAAAAATACTATACGAAAAGAGACTCCAGC                      | SD          |
| 5'P_lpg2455_171-190_sense | <u>AATTCTCAGTCAAGATCCTGCTGGAGTCTCTTTTTGTATAGTATTTTT</u> | pEGFP-C1    |
| 5'P_lpg2455_171-190_anti  | <u>GATCCTTATCTGTTATCTTTACCACCAAAAATACTATACAAAAGA</u>    | pEGFP-C1    |
| 5'P_lpg2455_172-186_sense | <u>GACTCCAGCAGGATCTTGACTGAG</u>                         | pEGFP-C1    |
| 5'P_lpg2455_172-186_anti  | <u>AATTCTTCAAGATCCTGCTGGAGTCTCTTTTTGTATAGTATTTTTGGT</u> | pEGFP-C1    |
| 5'P_lpg2455_175-184_sense | <u>GGTTAAG</u>                                          | pEGFP-C1    |
| 5'P_lpg2455_175-184_anti  | <u>GATCCTTAACCACCAAAAATACTATACAAAAGAGACTCCAGCAGG</u>    | pEGFP-C1    |
| 5'P_lpl2374_171-190_sense | <u>ATCTTGAAG</u>                                        | pEGFP-C1    |
| 5'P_lpl2374_171-190_anti  | <u>AATTCTTGCTGGAGTCTCTTTTTGTATAGTATTTTTTAAG</u>         | pEGFP-C1    |
| 5'P_lpo2646_171-190_sense | <u>GATCCTTAAAAATACTATACAAAAGAGACTCCAGCAA</u>            | pEGFP-C1    |
| 5'P_lpo2646_171-190_anti  | <u>AATTCTCAGCAAAGATCCTGCTTGAGTCTCTTTTTGTACAGTATTTTT</u> | pEGFP-C1    |
| Zdhhc4(C179S)_for         | TGGTTGTAAGGAAAAGAGATAAG                                 | pEGFP-C1    |
| Zdhhc4(C179S)_rev         | <u>GATCCTTATCTCTTTCCTTTACAACCAAAAATACTGTACAAAAGAG</u>   | pEGFP-C1    |
| Zdhhc21(C120S)_for        | <u>ACTCAAGCAGGATCTTTGCTGAG</u>                          | pEGFP-C1    |
| Zdhhc21(C120S)_rev        | <u>AATTCTAAGCAAAGATCCTGTTTGGGTCTCTTGTGTATAGTATTTTT</u>  | pEGFP-C1    |
| lpg2455 SalI upst         | <u>TGTTGTAAAGACAACAGATAAG</u>                           | pEGFP-C1    |
| lpg2455 BamHI down        | <u>GATCCTTATCTGTTGTCTTTACAACCAAAAATACTATACAACAAGA</u>   | pEGFP-C1    |
|                           | <u>GACCCAAAACAGGATCTTTGCTTAG</u>                        | SD          |
|                           | GTTCGACCATCACTCTGTTTGGGTGAAC                            | SD          |
|                           | GTTCACCCAAACAGAGTGATGGTCAAC                             | SD          |
|                           | GGATGGACCATCACTCTCCTTGATAAACAATTG                       | SD          |
|                           | CAATTGTTTATCCAAGGAGAGTGATGGTCCATCC                      | SD          |
|                           | AAAAGTGCACATGACGAAAATTGTTTATCTACACAATGAC                | pmCherry-C1 |
|                           | AAAAGGATCCCTTGATTTATTTTCATTAATGATGGGGCTG                | pmCherry-C1 |

SD, site-directed mutagenesis; GW, Gateway™ cloning
